# Supplementary material for: Integrative analysis of oncogenic fusion genes and their functional impact in colorectal cancer
Source: Br J Cancer. 2018 Jun 29;119(2):230–40. doi: 10.1038/s41416-018-0153-3 (PMC6048111; doi:10.1038/s41416-018-0153-3)
Supplement: Supplementary file 5 — Supplementary table 1 [file 41416_2018_153_MOESM5_ESM.xlsx]

## Sheet: Table S1.
Supplementary Table 1. Primer information for fusion gene validation
	primer sequence	product size (bp)	Tm (℃)
ANAPC1-ZC3H8	F : 5' - TCTTGGAAGGCAGTGGAAAC - 3'	114	55
	R : 5' - CAGGAGTCAGTGGAGCATGA - 3'
APC-COMMD10	F : 5' - GGCAGAATGAAGGTCAAGGA - 3'	253	55
	R : 5' - GTAAGGGAATCCAGCTGTGC - 3'
ATIC-UXS1	F : 5' - GTTTGAATCTGGTCGCTTCC - 3'	112	55
	R : 5' - CTGCTGACGTTGCTGTTCAT - 3'
BOD1-WWC1	F : 5' - GGCCTTTTTGACAGCTTCC - 3'	230	55
	R : 5' - GTCGCCTGCAGGTCTAACTC - 3'
BOK-ING5	F : 5' - CAGTCTGAGCCTGTGGTGAC - 3'	106	55
	R : 5' - GCATCAGCTGGAAGTTCCTC - 3'
CHIC1-HDX	F : 5' - CCGTTCTAACAGGGAAGGTG - 3'	339, 393	55
	R : 5' - TTCGATTCCCAATCCAAGTC - 3'
GTF3A-CDK8	F : 5' - ATCTGCTCCTTCCCTGACTG - 3'	208	55
	R : 5' - TGAAACTTGATTATATGCCAGAGG - 3'
LMNA-NTRK19	F : 5' - CCAGGTGGAGCAGTATAAGAAG- 3'	354	54
	R : 5' - TGTGGGTTCTCGATGATGTG- 3'
NAGLU-IKZF3	F : 5' - CTCTTCCTGCGAGAGCTGAT - 3'	248	55
	R : 5' - GCGTTATTGATGGCTTGGTC - 3'
OSBPL10-GADL1	F : 5' - AACACCCAATTCTGCGTCTC - 3'	288	55
	R : 5' - TCCAGGAGGAAGTCCATGTC - 3'
PTPRK-RSPO3	F : 5' - CTCTCTCCTTGGCCTCTCCT - 3'	159, 1221	55
	R : 5' - GCCAATTCTTTCCAGAGCAA - 3'
RAB1B-DPP3	F : 5' - GGACTTCAAGATCCGAACCA - 3'	194	55
	R : 5' - TGCCCATGTTGGAGTAAACA - 3'
RASA1-LOC644100	F : 5' - GGACGAAGGTGACTCTCTGG - 3'	166	55
	R : 5' - GCCCAGGCAGTTCTTCTCTA - 3'
RIMS3-SCMH1	F : 5' - TCAGTGGAGCAAGAGCACAC - 3'	117	55
	R : 5' - AAATGGTCAGGGAGTTGCTG - 3'
RNF121-FOLR2	F : 5' - GAGGTGGAGGTTGGAGGTG - 3'	249, 423	55
	R : 5' - GCTCTGATTCACCTGCTGGA - 3'
STRN-ALK	F : 5' - CCACAAGTTGAAATACGGGACAGAA- 3'	134	55
	R : 5' - TCAGCTTGTACTCAGGGCTCT - 3'
TAF4-NDRG3	F : 5' - AAAGGAGATGCAGCAACAGG - 3'	240, 315	55
	R : 5' - TCTCTGCGTCCATTGTAGGA - 3'
TMOD3-MAPK6	F : 5' - TGAGCTCCTTGGGAATCTGT - 3'	167, 282	60
	R : 5' - TTCCACTGGGACCAAGAATC - 3'
TMPRSS2-PDE9A	F : 5' - AGCGGATCCACCAGCTTTAT - 3'	227, 407	55
	R : 5' - AGGACAGCCAAGTGATTTGC - 3'
TPM3-NTRK19	F : 5' - AAGAAGATAAATATGAGG- 3'	406, 553, 712	55.7
	R : 5' - CCGTGCCGCATATACTCAAA- 3'
TRIM24-BRAF	F : 5' - AGAAGCCAATGGGTTTTGTG - 3'	228	55
	R : 5' - GACTTCCTTTCTCGCTGAGG - 3'
USP32-NSF	F : 5' - TCATATTACATGGGCCAGCA - 3'	168	55
	R : 5' - TGAAAATCGAGGGCCAATAG - 3'
VTI1A-TCF7L2	F : 5' - TGGATTTGGAAGTCCGAGAG - 3'	243	58
	R : 5' - ACGTGATAAGAGGCGTGAGG - 3'
ZYG11A-GPX7	F : 5' - CTCCTGACGCTCAGAAGGAT - 3'	100	58
	R : 5' - CGGTAGTGCTGGTCTGTGAA - 3'
