# Supplementary material for: Integrative analysis of oncogenic fusion genes and their functional impact in colorectal cancer
Source: Br J Cancer. 2018 Jun 29;119(2):230–40. doi: 10.1038/s41416-018-0153-3 (PMC6048111; doi:10.1038/s41416-018-0153-3)
Supplement: Supplementary file 6 — Supplementary table 2 [file 41416_2018_153_MOESM6_ESM.xlsx]

## Sheet: Table S2.
Supplementary Table 2. Primer information for acceptor gene expression
	primer sequence	product size (bp)	Tm (℃)
CDK8	F : 5' - AGCAGGGCAATAACCACACT - 3'	118	55
	R: 5' - CCACCTGAGGTAGTGGTAGGA - 3'
IKZF3	F : 5' - ATCAACAAGGAAGGGGAGGT - 3'	195	55
	R : 5' - GGCTCTGTGTTCTCCTCTGG - 3'
FOLR2	F : 5' - GTGAAGGCCTCTGGAGTCAC - 3'	168	55
	R : 5' - CAGTCCCATGAAGCATCTCA - 3'
ALK	F : 5' - GCAACATCAGCCTGAAGACA - 3'	192	55
	R: 5' - GCCTGTTGAGAGACCAGGAG - 3'
